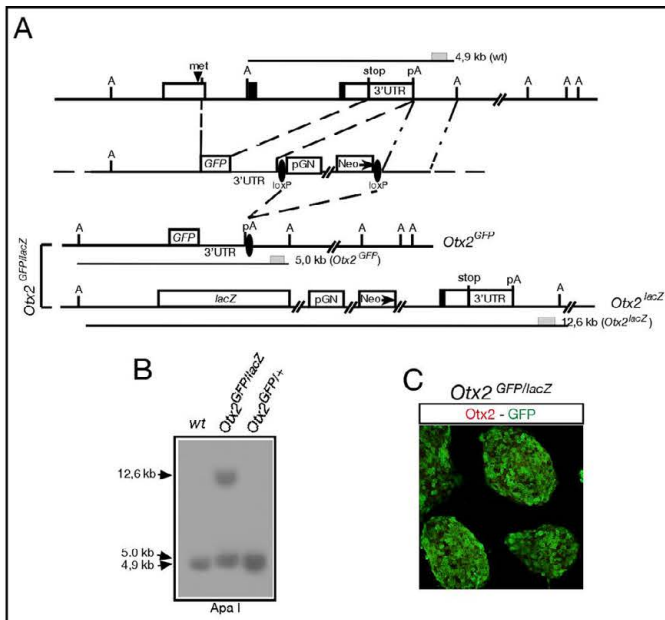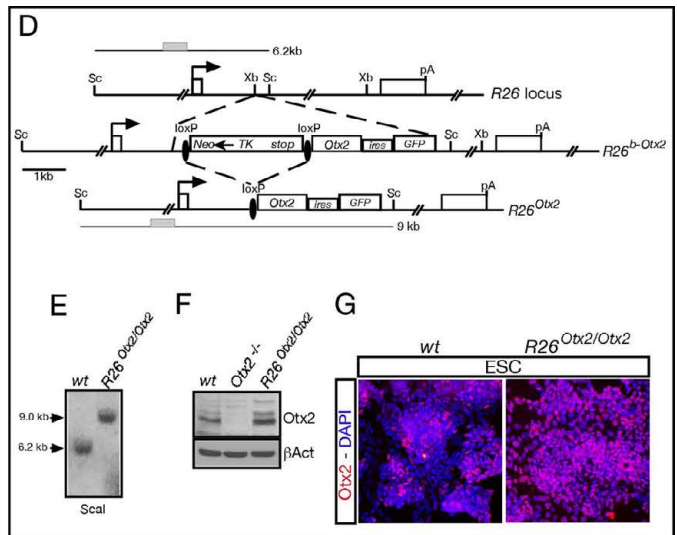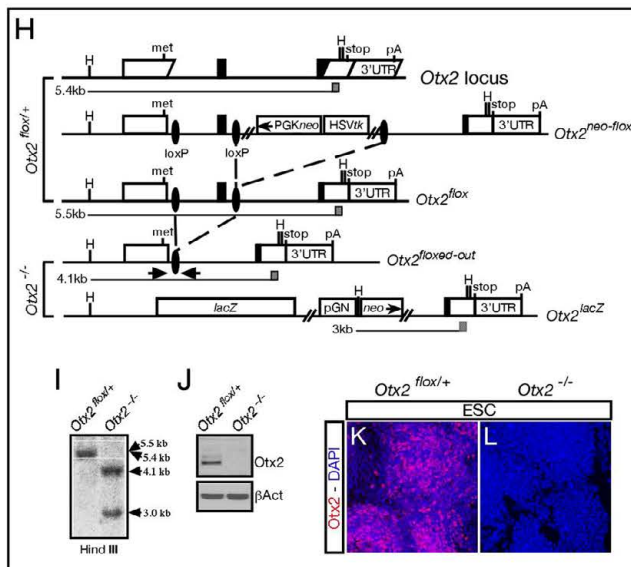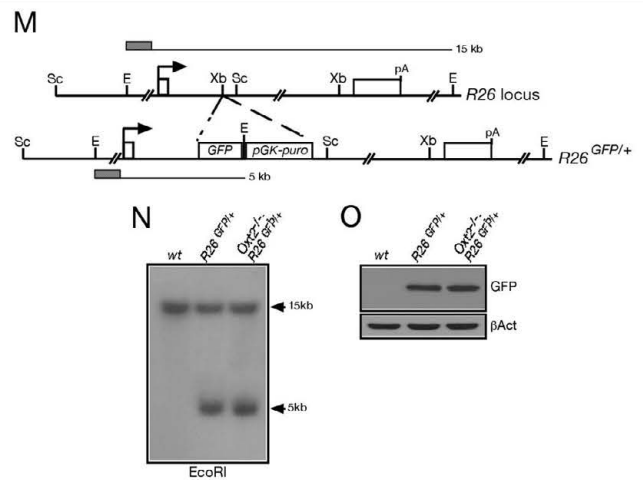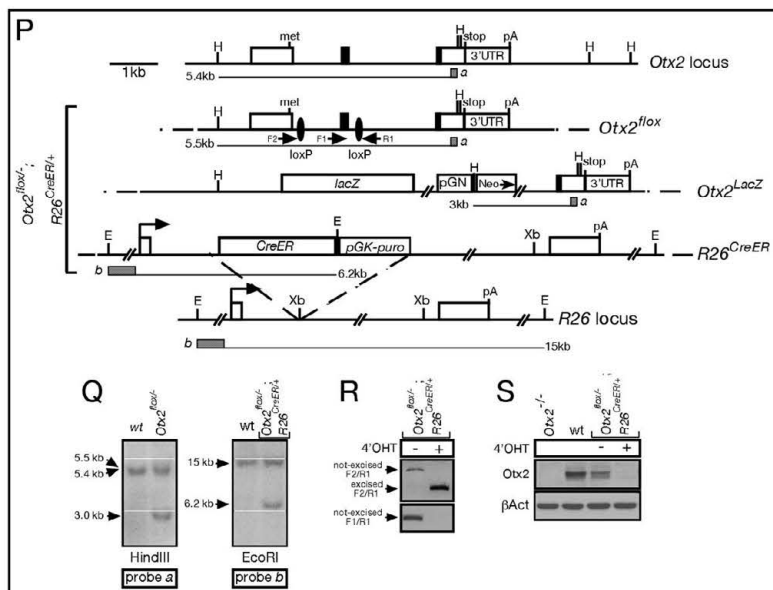

**Fig. S1. Generation of *Otx2* mutant ESC lines.** (A) Schematic representation of the *Otx2*<sup>GFP/lacZ</sup> targeting strategy. (B) Southern blot of control and mutant ESC lines with the probe corresponding to the gray box in A. (C) Immunohistochemistry assay with Otx2 and GFP shows lack of Otx2 and GFP immunoreactivity in *Otx2*<sup>GFP/lacZ</sup> (*Otx2*<sup>-/-</sup>) ESCs. (D) Targeting strategy for the *R26*<sup>Otx2</sup> allele. (E) Southern blot hybridized with the external probe (gray box in D). (F) Western blot probed with Otx2 and  $\beta$ -actin antibodies shows that, compared with wt, in *R26*<sup>Otx2/Otx2</sup> ESCs the Otx2 total level is approximately doubled. (G) Immunohistochemistry assays showing ubiquitous expression of Otx2 in *R26*<sup>Otx2/Otx2</sup> ESCs. (H) To generate the *Otx2*<sup>-/-</sup>; *R26*<sup>GFP/+</sup> ESC line for chimerism studies, we first inactivated Otx2 through sequential steps required to obtain a new *Otx2*<sup>-/-</sup> ESC line without GFP. (I) Southern blot hybridized with the external probe (hatched box in H). (J-L) Western blots probed with Otx2 and  $\beta$ -actin antibodies (J) and immunohistochemistry assays showing the lack of Otx2 (K,L). (M) The *Otx2*<sup>-/-</sup> ESC line in H was retransfected to insert the *GFP* gene into one *Rosa26* allele using a GFP, pGK-puro targeting vector; in parallel, E14Tg2a ESCs were transfected only with the GFP targeting construct to generate an *R26*<sup>GFP/+</sup> ESC line to be used as control in chimerism studies. (N,O) Southern and western blot assays of the *R26*<sup>GFP/+</sup> and *Otx2*<sup>-/-</sup>; *R26*<sup>GFP/+</sup> mutant ESC lines hybridized with the external probe (hatched box in M) (N), and probed with GFP and  $\beta$ -actin antibodies (O). (P) Schematic representation of targeted alleles and sequential steps required to obtain the *Otx2*<sup>fllox/-</sup>; *R26*<sup>CreER/+</sup> ESC line. (Q) Southern blots hybridized with the *Otx2*-specific external probe *a* and with the *Rosa26*-specific external probe *b* (gray boxes in P). (R) Representative PCRs with the indicated primers (horizontal arrows in P) to check *Otx2* DNA excision after 36 hours of exposure to 4-OHT. (S) Western blot probed with the Otx2 antibody to show full Otx2 inactivation.  $\beta$ -actin is employed to normalize cell extracts. A, S, X, H, E indicate *Apa*I, *Sca*I, *Xba*I, *Hind*III and *Eco*RI, respectively; pA indicates the poly(A) addition site.

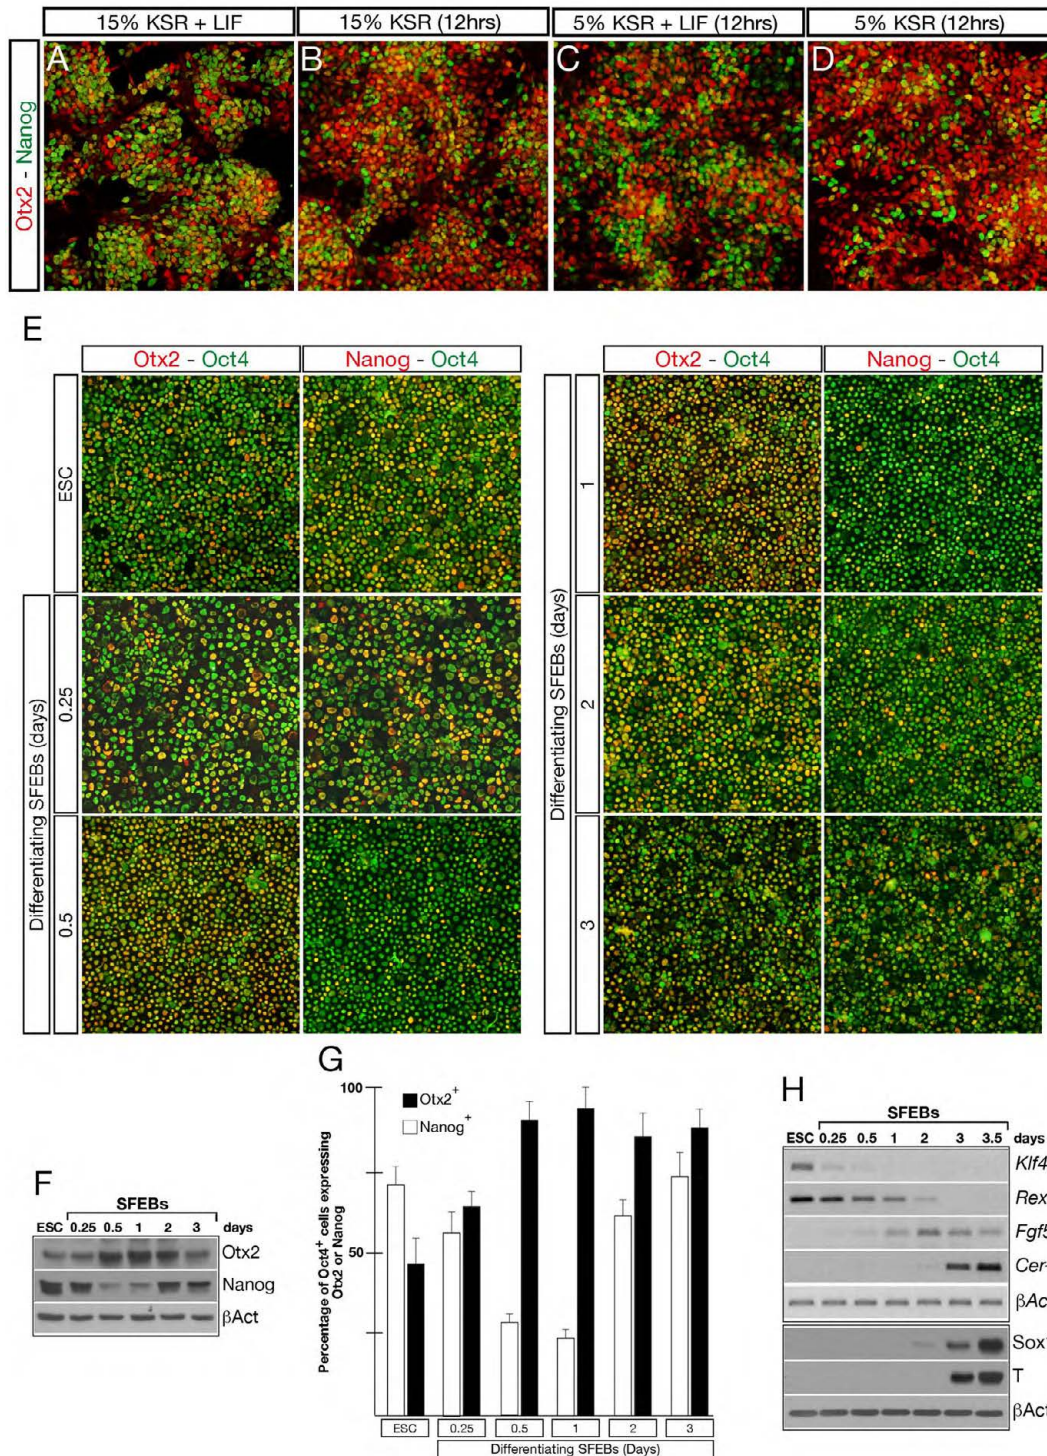

**Fig. S2. Otx2 expression is activated by culture conditions favoring differentiation.** (A-D) Otx2 and Nanog immunohistochemistry assays show that, compared with normal ESC culture conditions (A), LIF withdrawal (B), or diminished concentration of KSR (C) or both LIF withdrawal and reduced concentration in KSR (D) generate a rapid increase in the number of ESCs expressing Otx2 and a corresponding decrease of those expressing Nanog. (E-G) Immunohistochemistry experiments (E), western blots (F), and cell-counting analysis (G) show the expression profile (E,F) and the percentage of Oct4<sup>+</sup> cells co-expressing Otx2 or Nanog at the indicated days (d) of differentiation (G), and reveal that Otx2 expression expands to virtually all Oct4<sup>+</sup> cells within d1 and mirrors the early reduction in Nanog<sup>+</sup> cells. (H) Western blots and RT-PCR assays show that Otx2 activation mirrors also the extinction of *Klf4* and *Rex1* expression and anticipates the maximal activation of the epiblast markers *Fgf5* and *Cer-1* before differentiation into Sox1<sup>+</sup> neural and T<sup>+</sup> mesendoderm cells occurs.  $\beta$ -actin is used to normalize western blots and RT-PCRs.



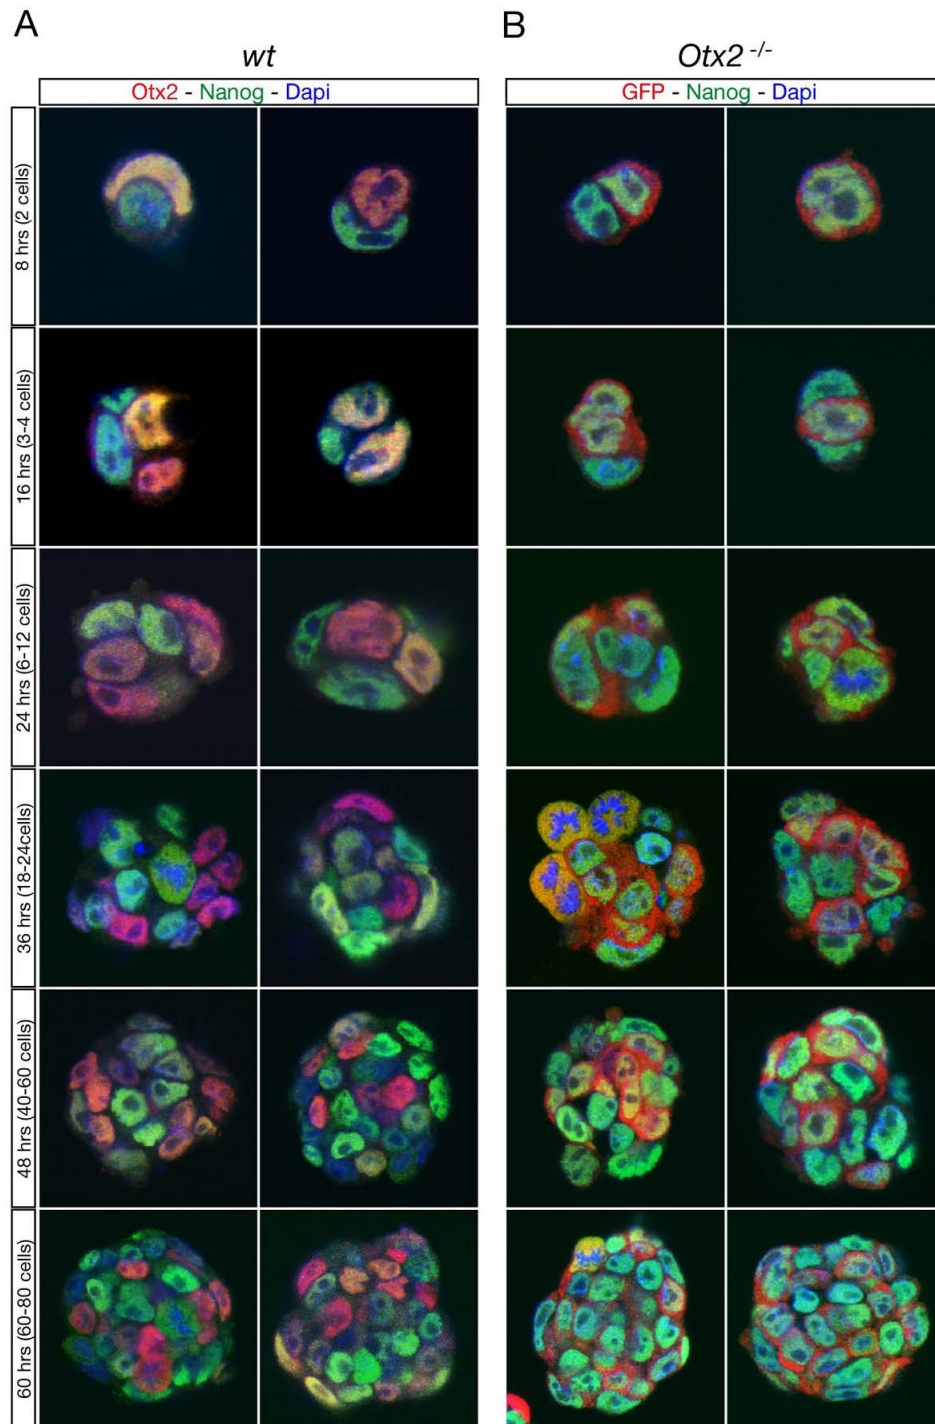

**Fig. S3. Lack of *Otx2* abolishes cell-to-cell variations of *Nanog* expression during formation of ESC colonies.** Co-immunohistochemistry assays with *Otx2* and *Nanog*, and GFP and *Nanog*, show that during the early formation of wt ESC colonies since the first cell duplication, *Otx2* and *Nanog* exhibit variable degrees of complementarity and co-expression (**A**); conversely, in *Otx2<sup>-/-</sup>* ESCs, the expression profile generally observed is characterized by the constitutive high expression of *Nanog* regardless of the GFP expression (**B**). For each time point, two examples per genotype are shown.

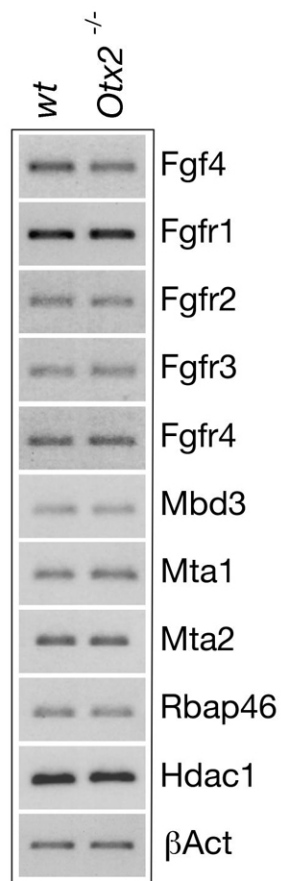

**Fig. S4. Expression analysis of Fgf4, Fgf receptors and components of the NuRD complex.** Compared with wt, only the expression level of *Fgf4* shows a mild reduction in *Otx2*<sup>-/-</sup> ESCs, whereas that of *Fgfr1*, *Fgfr2*, *Fgfr3*, *Fgfr4*, *Mbd3*, *Mta1*, *Mta2*, *Rbap46* and *Hdac1* appears unaltered in *Otx2*<sup>-/-</sup> ESCs.

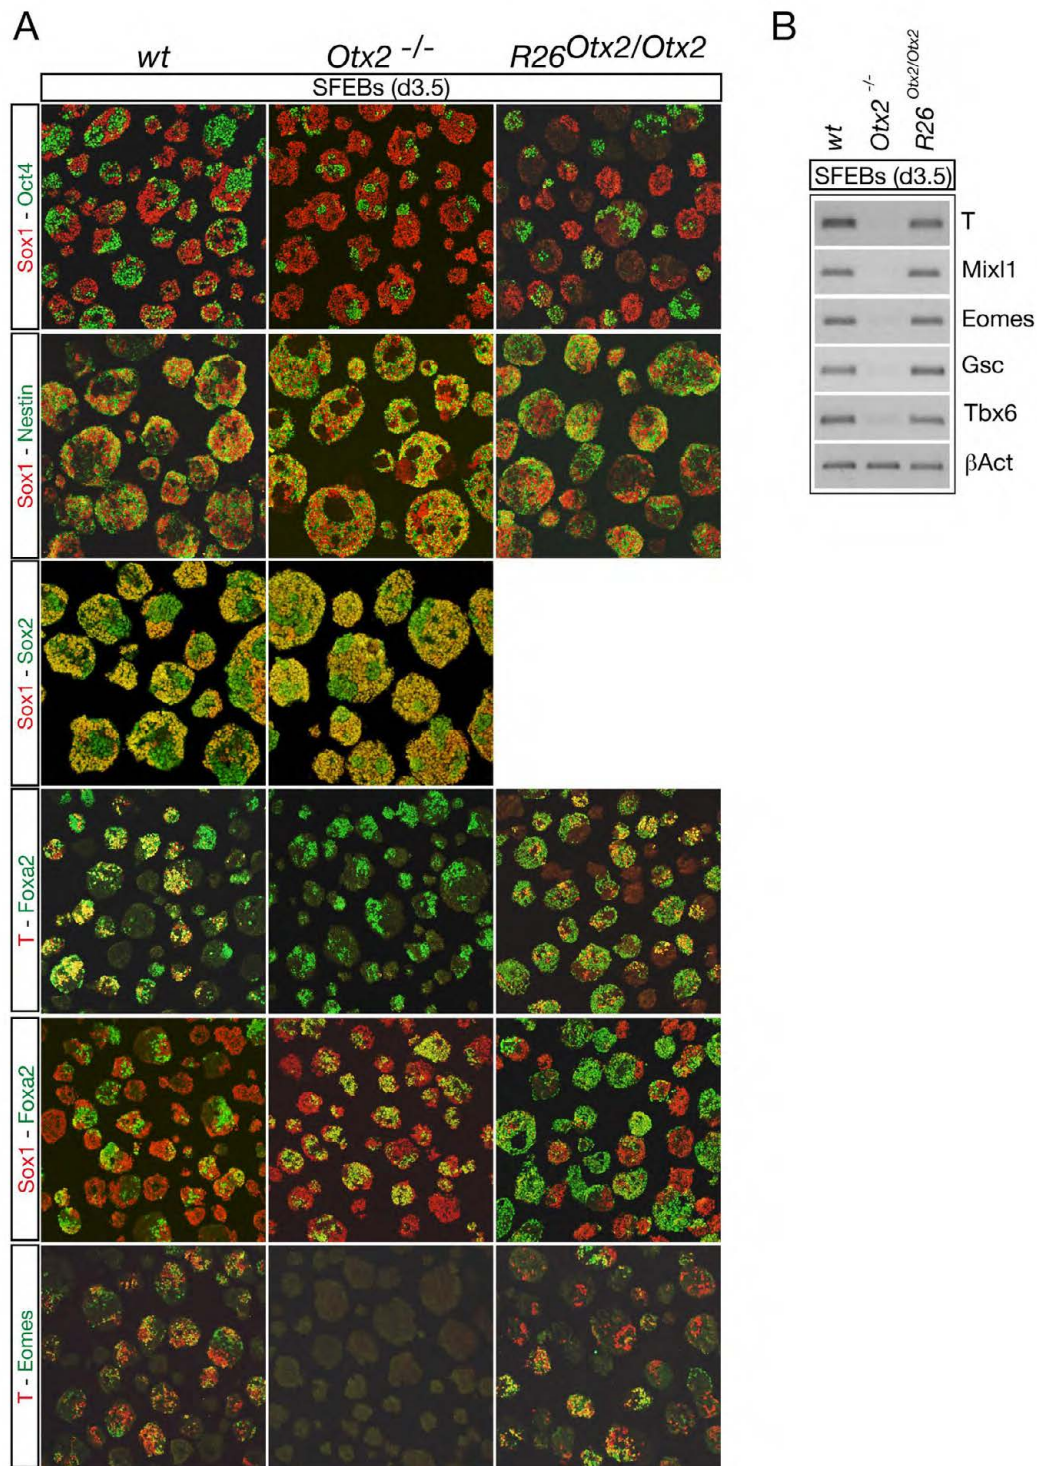

**Fig. S5. *Otx2* affects cell lineage decisions in differentiating SFEBS.** (A) Immunohistochemistry experiments on d3.5 wt, *Otx2*<sup>-/-</sup> and *R26*<sup>*Otx2/Otx2*</sup> SFEBS sections with Sox1 and Oct4, Sox1 and nestin, Sox1 and Sox2 (only for wt and *Otx2*<sup>-/-</sup> SFEBS), T and Foxa2, Sox1 and Foxa2, and T and Eomes show that, compared with wt, *Otx2*<sup>-/-</sup> SFEBS differentiate only in Sox1<sup>+</sup> Nestin<sup>+</sup> Sox2<sup>+</sup> Oct4<sup>-</sup> neural cells, which are negative for the expression of T and Eomes and fully co-express Foxa2 with Sox1; by contrast, *R26*<sup>*Otx2/Otx2*</sup> ESCs generate fewer neural cells, exhibit at d3.5 a number of T<sup>+</sup> cells similar to that of wt SFEBS, but show a substantial increase in Foxa2<sup>+</sup> Sox1<sup>-</sup> presumptive endodermal cells. (B) Expression analysis of mesendoderm markers shows that in *Otx2*<sup>-/-</sup> SFEBS, lack of *T* correlates with loss of *Mixl1*, *Eomes*, *Gsc* and *Tbx6*, whose expression is retained in *R26*<sup>*Otx2/Otx2*</sup> SFEBS.



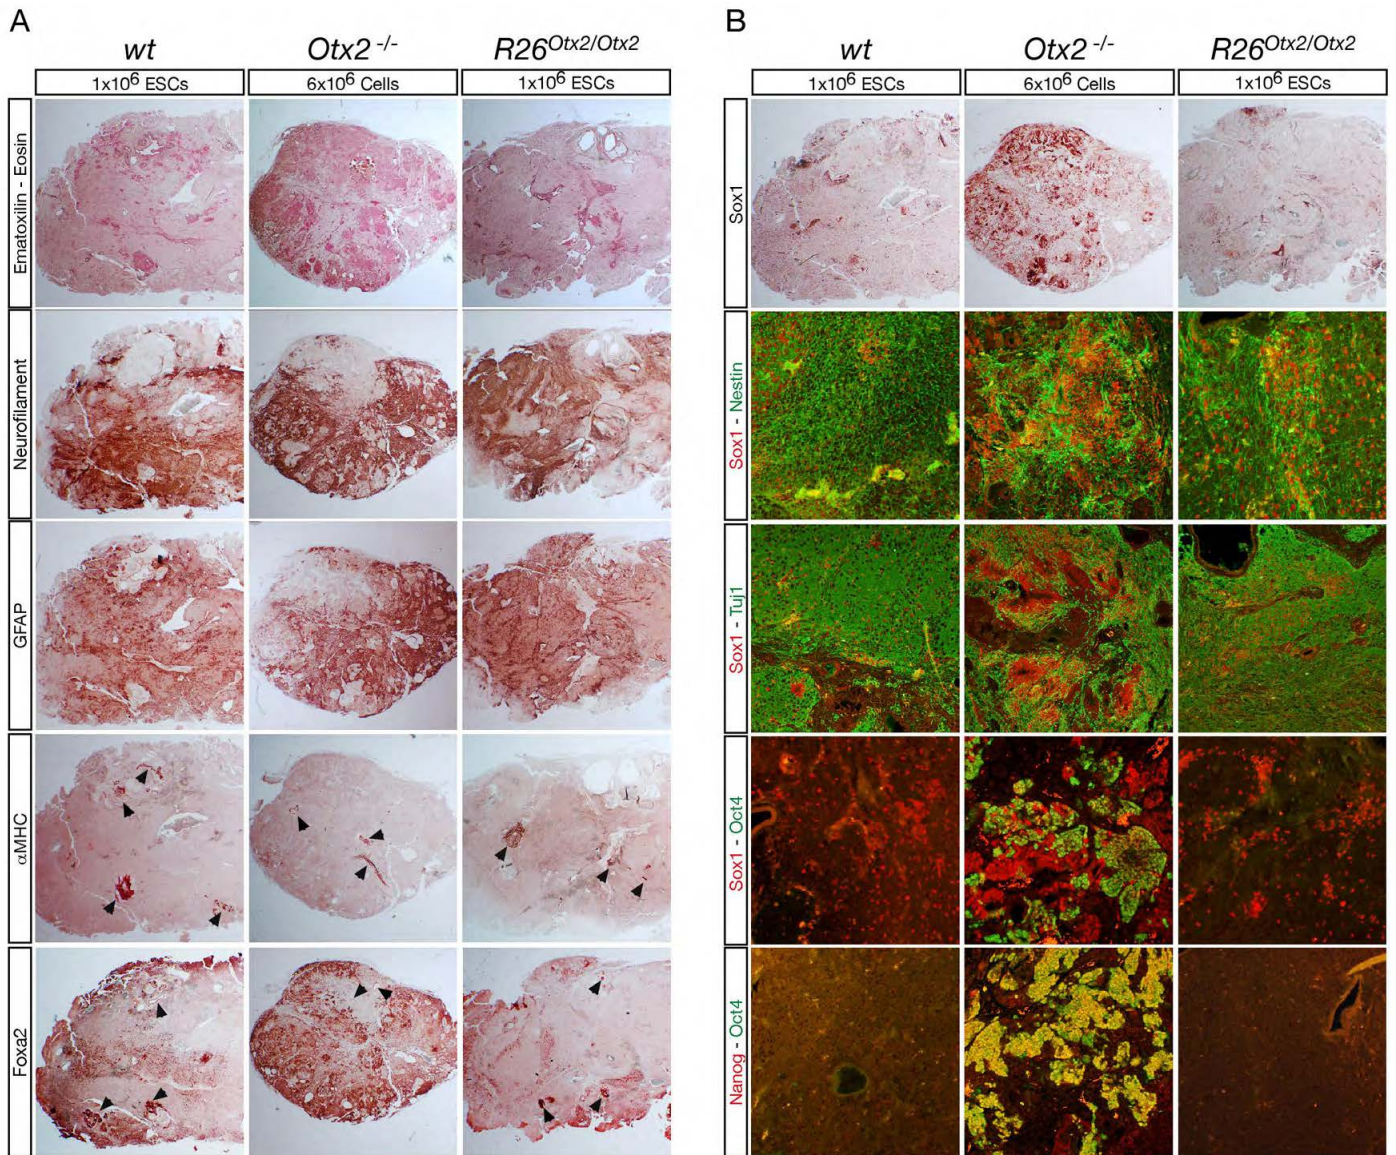

**Fig. S6. Differentiation of teratomas generated by *Otx2* mutant ESC lines.** (A) Wt, *Otx2*<sup>-/-</sup> and *R26*<sup>*Otx2/Otx2*</sup> ESC-derived teratomas generate neuronal and glial cells as revealed by neurofilament and Gfap staining, as well as muscle-like and endodermal-like structures as revealed by  $\alpha$ MHC and Foxa2 staining (arrowheads). (B) However, *Otx2*<sup>-/-</sup> ESC-derived teratomas retain unusual enrichment of Sox1<sup>+</sup> nestin<sup>+</sup> rosette-like neural progenitors, which differentiate into Tuj1<sup>+</sup> neurons, and widespread distribution of Oct4<sup>+</sup> Nanog<sup>+</sup> pluripotent cell clusters. Note that Oct4<sup>+</sup> cells frequently co-expressed Sox1.

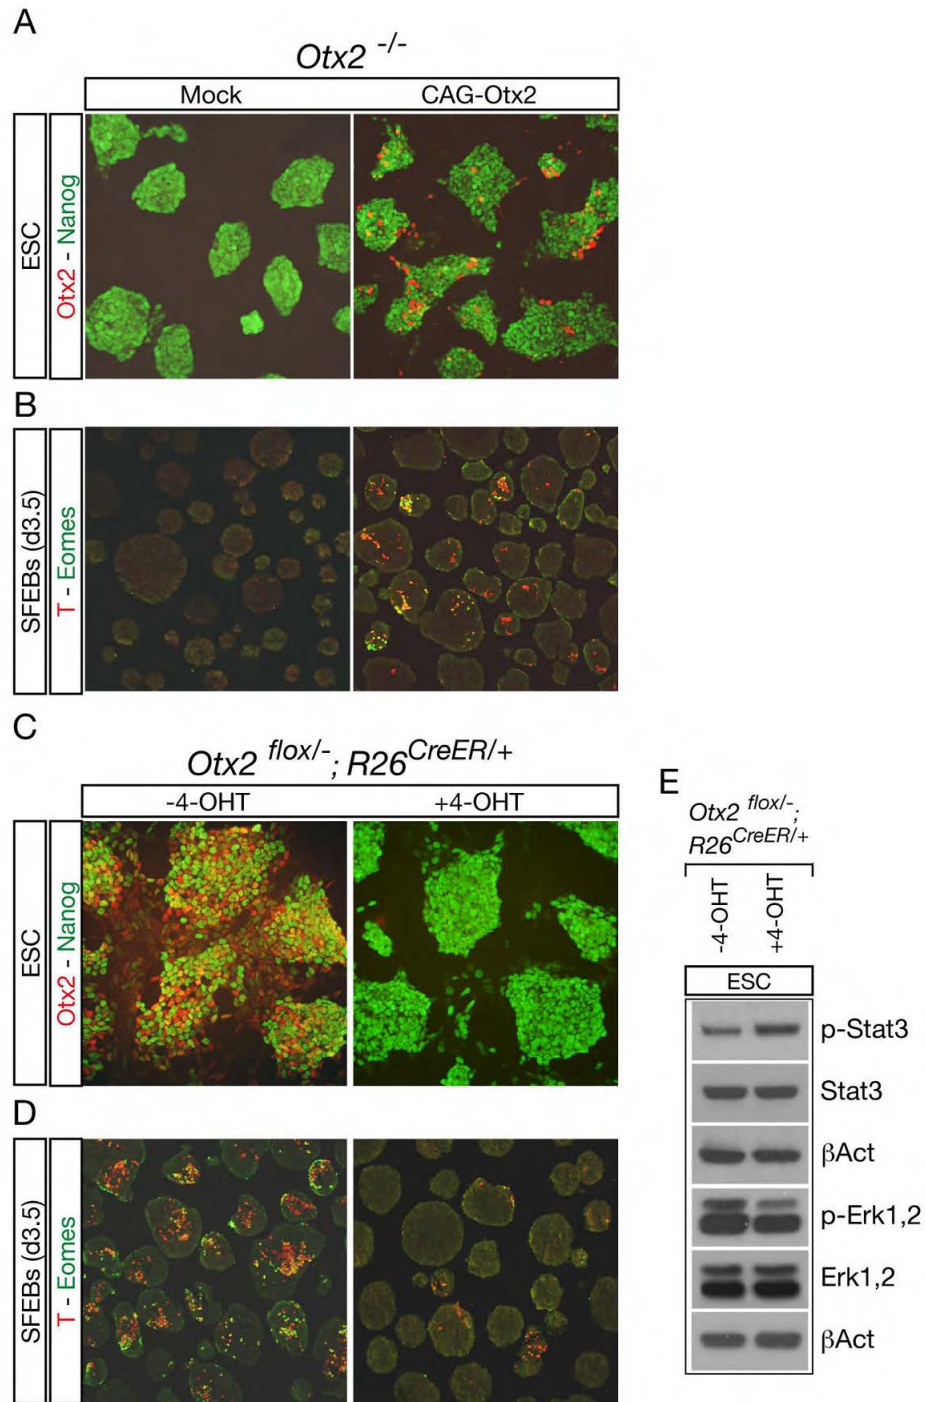

**Fig. S7. Phenotypic features of *Otx2*<sup>-/-</sup> ESCs are not due to adaptation and can be rescued by *Otx2* reintroduction.** (A,B) Immunohistochemistry experiments with *Otx2* and *Nanog* on *Otx2*<sup>-/-</sup> ESCs transfected (48 hours before) or not with the pCAG-*Otx2* plasmid (A), and with *T* and *Eomes* on *Otx2*<sup>-/-</sup> d3.5 SFEBS generated from *Otx2*<sup>-/-</sup> ESCs transfected or not with the pCAG-*Otx2* plasmid (B). (C,D) Immunohistochemistry with *Otx2* and *Nanog* and with *T* and *Eomes*, respectively, on *Otx2*<sup>flox/-</sup>; *R26*<sup>CreER/+</sup> ESCs previously treated or not with 4-OHT (C), and on *Otx2*<sup>flox/-</sup>; *R26*<sup>CreER/+</sup> SFEBS generated from ESCs previously treated or not with 4-OHT for 3 days (D). (E) Western blots to detect the endogenous level of p-Stat3, total Stat3, p-Erk1,2 and total Erk1,2 in *Otx2*<sup>flox/-</sup>; *R26*<sup>CreER/+</sup> ESCs treated or not for 3 days with 4-OHT. Western blots are normalized by β-actin.



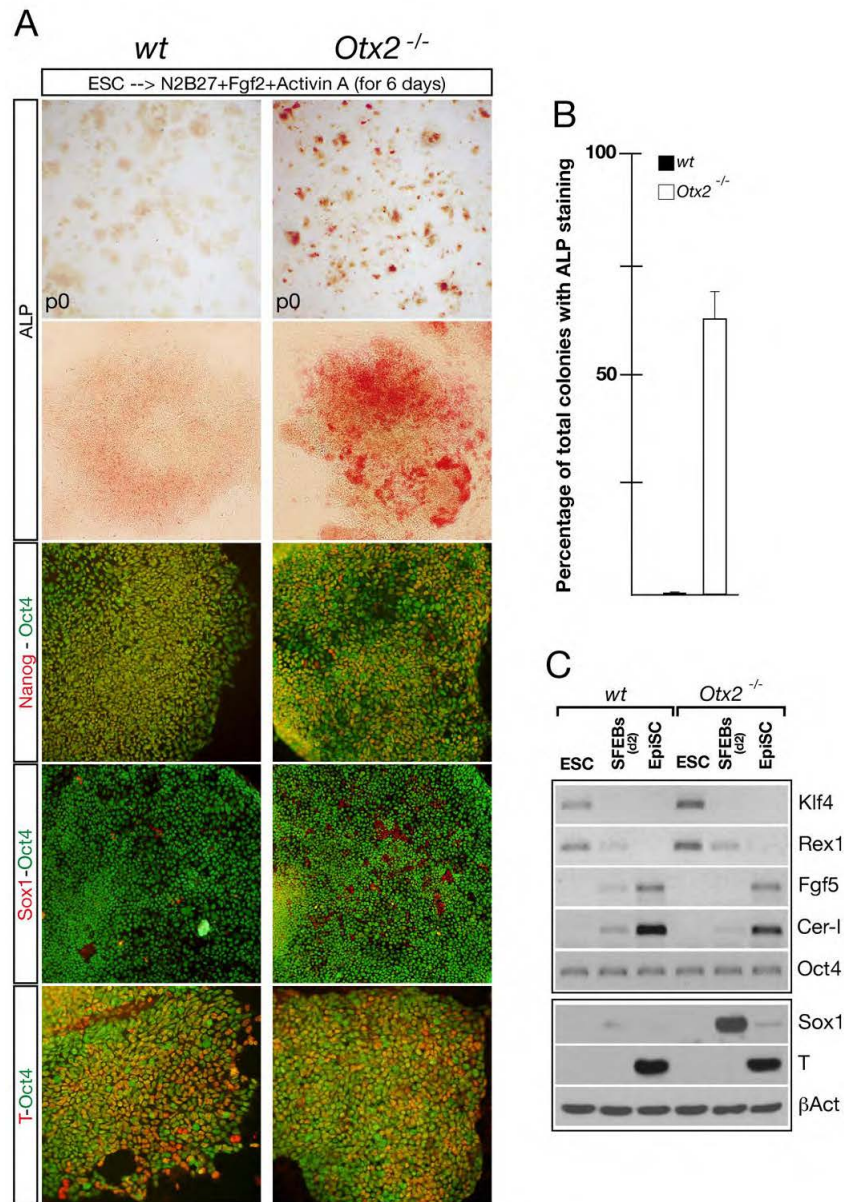

**Fig. S8. Fgf2 and activin A induce a fairly normal initial specification of EpiSCs in the absence of Otx2. (A-C)** Compared with wt, *Otx2*<sup>-/-</sup> EpiSCs induced for 6 days with Fgf2 and activin A exhibit similar expression for *Fgf5*, *Cer-1*, *Sox1* and *T* (A,C), but show abnormal ALP staining in about 60% of the EpiSC colonies (A,B). RT-PCRs are normalized by *Oct4* and western blots by β-actin.

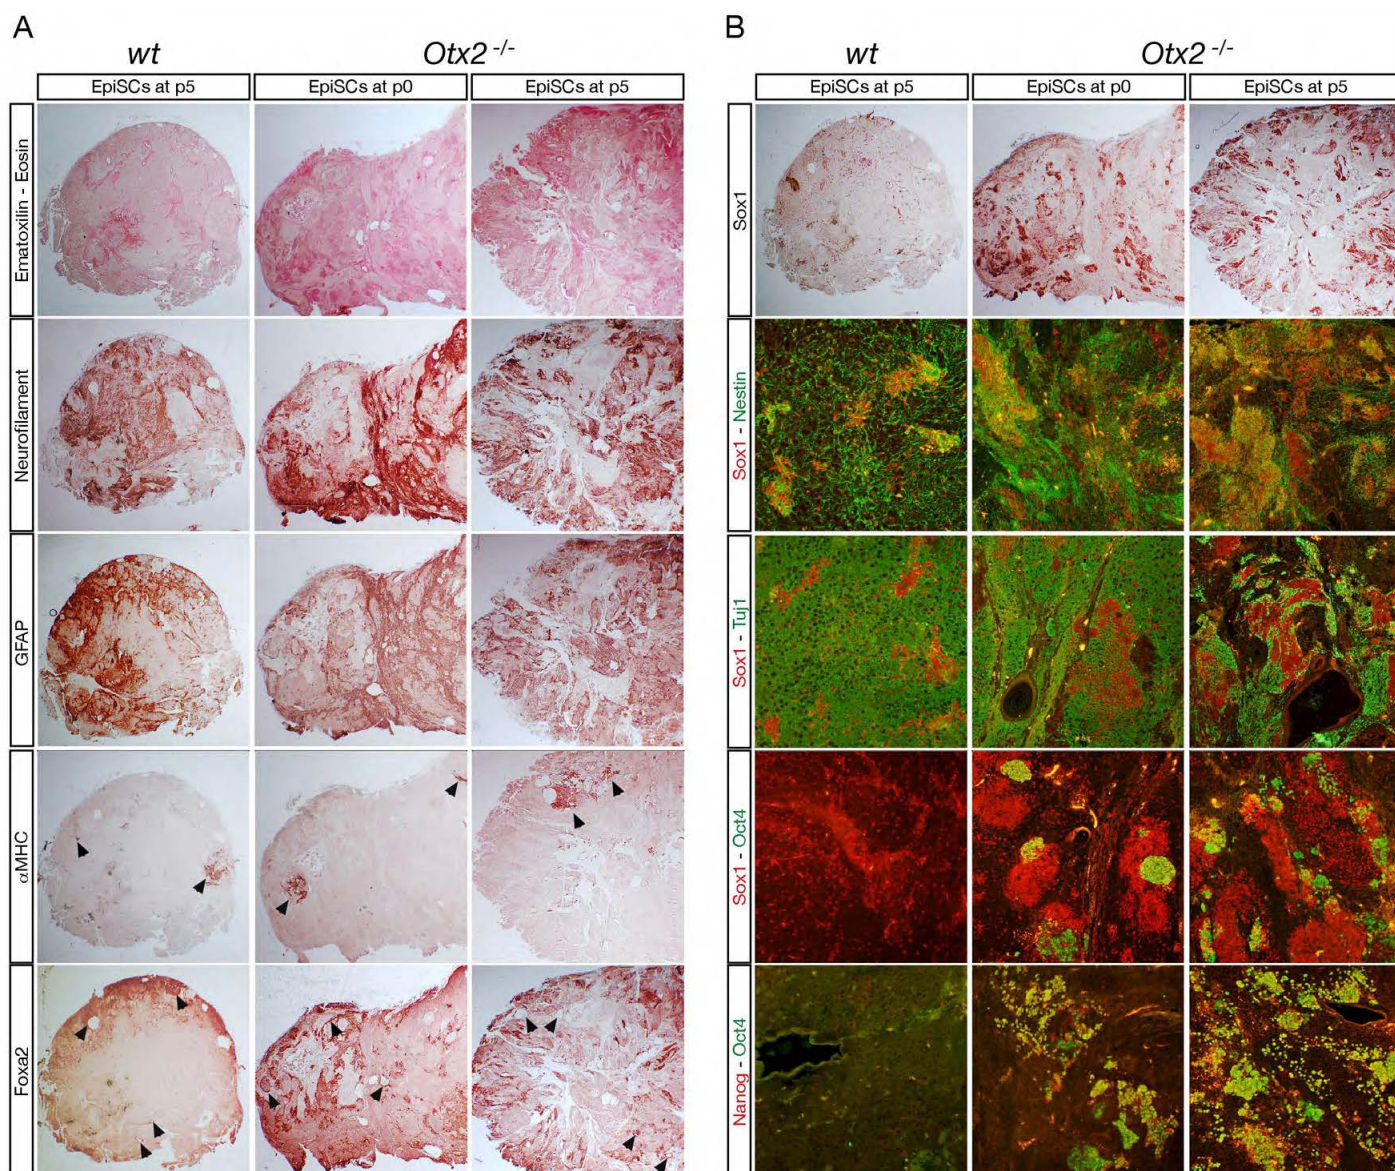

**Fig. S9. Differentiation of *Otx2*<sup>-/-</sup> EpiSC-derived teratomas.** (A) Compared with p5 *wt* EpiSC-derived teratomas, those derived from p0 and p5 *Otx2*<sup>-/-</sup> EpiSCs exhibit neuronal, glial, muscle-like and endodermal-like structures as revealed by neurofilament, Gfap, αMHC (arrowheads) and Foxa2 (arrowheads) staining. (B) However, *Otx2*<sup>-/-</sup> teratomas show numerous Sox1<sup>+</sup> nestin<sup>+</sup> rosette-like structures and Oct4<sup>+</sup> Nanog<sup>+</sup> cell clusters. Note that the number of Sox1<sup>+</sup> nestin<sup>+</sup> and Oct4<sup>+</sup> Nanog<sup>+</sup> cell clusters appears increased in teratomas generated by *Otx2*<sup>-/-</sup> EpiSCs passaged several times.



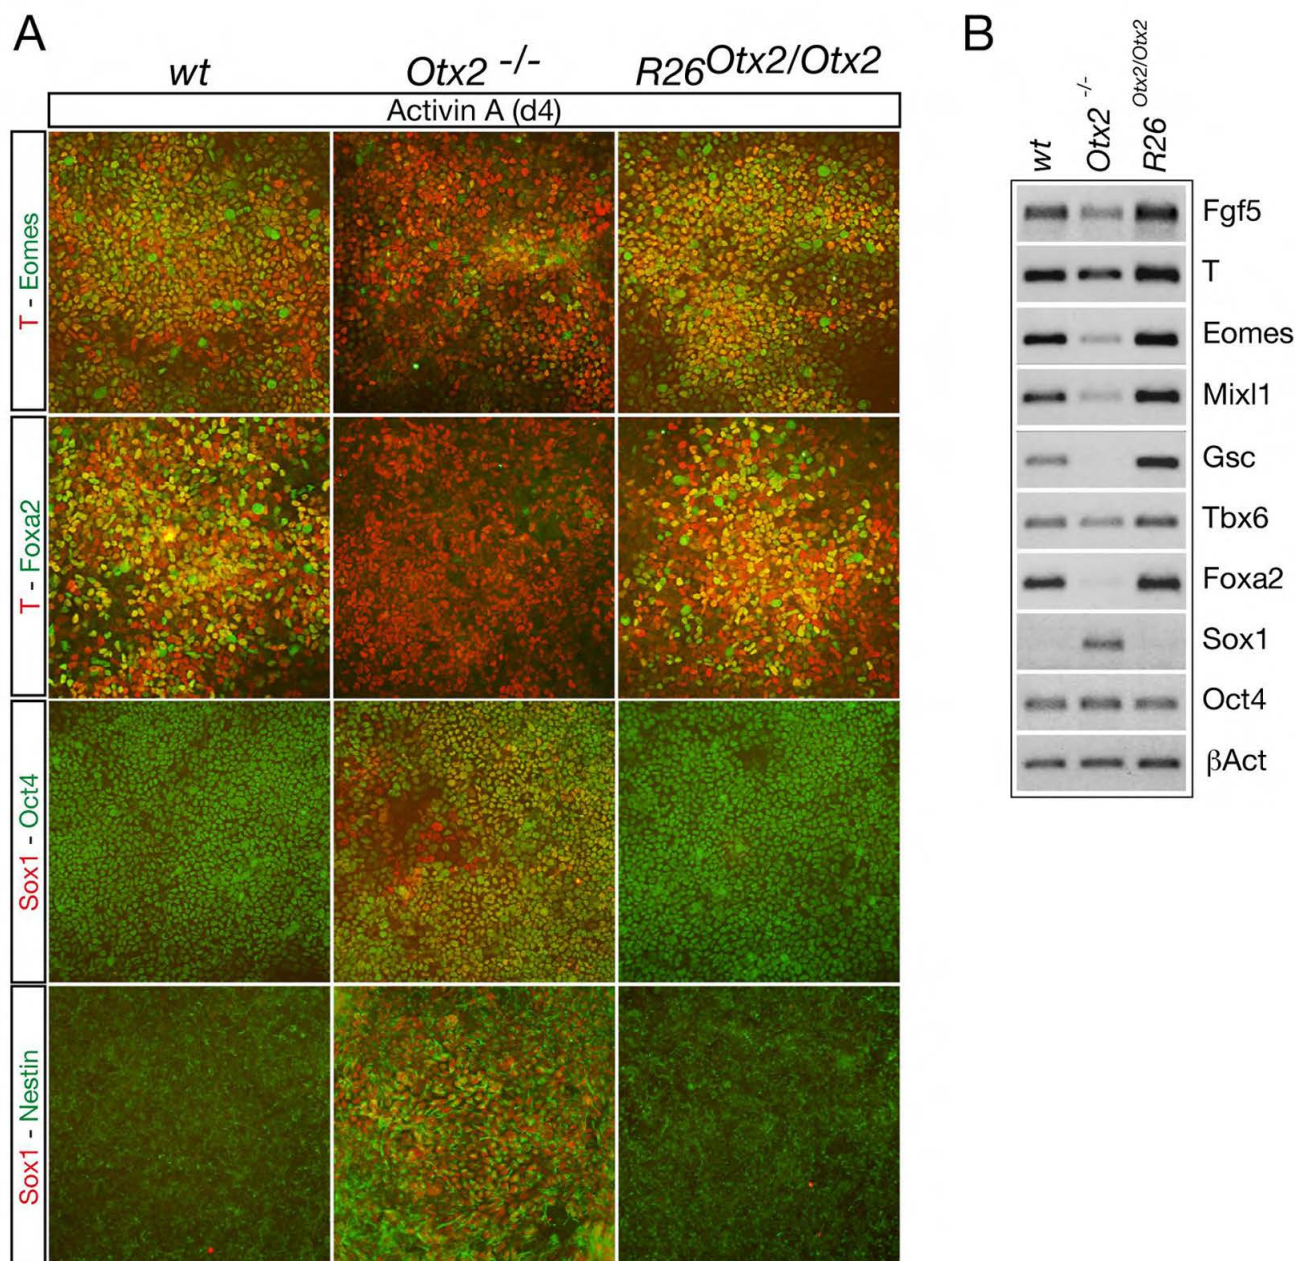

**Fig. S10. Mesendoderm induction by activin A is affected in *Otx2*<sup>-/-</sup> and enhanced in *R26*<sup>*Otx2/Otx2*</sup> ESCs. (A,B)** Mesendoderm induction shows that in the absence of *Otx2* the expression level of *Eomes*, *Mixl1*, *Gsc* and *Foxa2* is strongly reduced (A,B), *Fgf5* expression is moderately diminished (B), that of *Tbx6* and *T* shows only a mild decrease (A,B), and, importantly, Sox1<sup>+</sup> nestin<sup>+</sup> neural progenitors are detected in numerous Oct4<sup>+</sup> patches (A,B); conversely, the expression of mesendoderm markers is enhanced in *R26*<sup>*Otx2/Otx2*</sup> mutant cells (A,B).



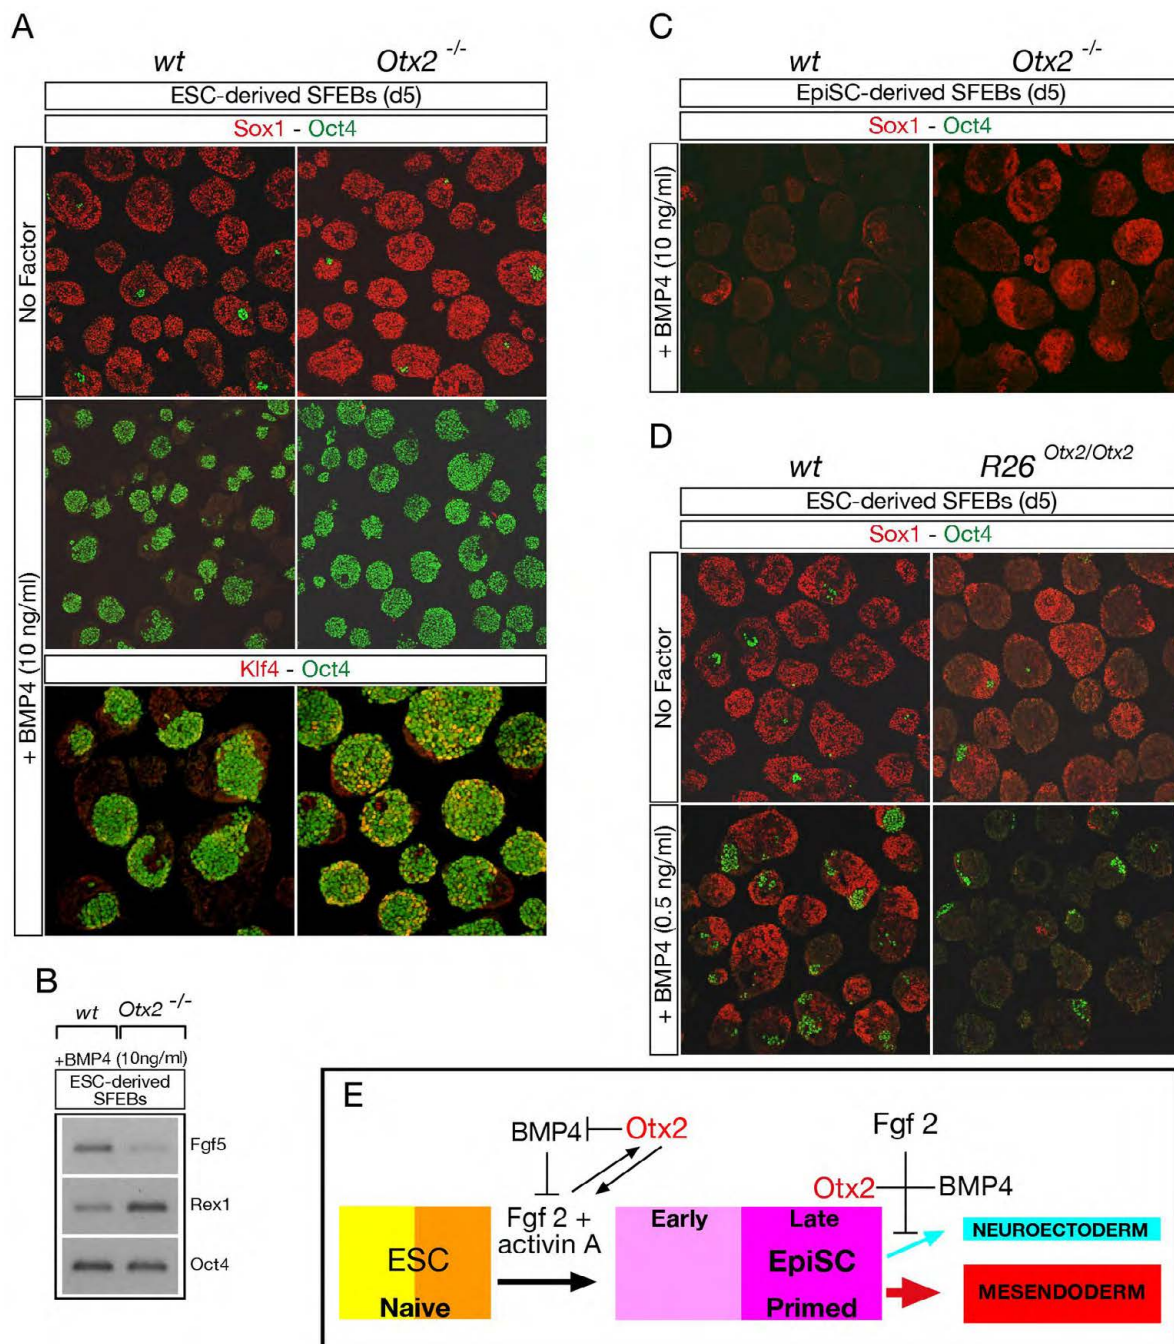

**Fig. S11. *Otx2* cooperates with BMP4 to suppress neural fate and promote differentiation of non-neural cells.** (A) Immunohistochemistry assays with Sox1 and Oct4 and Klf4 and Oct4 on d5 wt and *Otx2*<sup>-/-</sup> ESC-derived SFEBs cultured without (no factor) or with BMP4 show that, compared with wt, *Otx2*<sup>-/-</sup> SFEBs cultured without BMP4 generate only neural cells, whereas when administered with BMP4 at high dosage (10 ng/ml) *Otx2*<sup>-/-</sup> SFEBs contain almost exclusively Oct4<sup>+</sup> pluripotent cells and exhibit a significant increase in Oct4<sup>+</sup> cells co-expressing the ESC marker Klf4. (B) RT-PCR assays showing that in *Otx2*<sup>-/-</sup> SFEBs the expression of *Rex1* and *Fgf5* is respectively higher and lower than that exhibited by wt SFEBs. RT-PCRs are normalized by *Oct4*. (C) Immunohistochemistry assays with Sox1 and Oct4 on wt and *Otx2*<sup>-/-</sup> EpiSC-derived SFEBs show that, in contrast to wt, high dosage of BMP4 (10 ng/ml) is not sufficient to efficiently suppress neural fate in *Otx2*<sup>-/-</sup> SFEBs. (D) Immunohistochemistry assays with Sox1 and Oct4 on wt and *R26*<sup>*Otx2/Otx2*</sup> ESC-derived SFEBs untreated or treated with BMP4 show that, compared with wt, untreated *R26*<sup>*Otx2/Otx2*</sup> SFEBs generate fewer Sox1<sup>+</sup> neural cells and, when administered with a very low dosage of BMP4 (0.5 ng/ml), *R26*<sup>*Otx2/Otx2*</sup> SFEBs exhibit a substantial enhancement of the BMP4 anti-neuralizing activity. (E) Schematic representation of putative *Otx2* actions in ESC transition to EpiSCs and maintenance of the EpiSC condition shows that *Otx2* might be involved in the initial priming of ESC transition into EpiSCs by establishing a mutual positive loop with Fgf2 signaling and an antagonism on BMP4 signaling, which, in turn, antagonizes Fgf2-mediated priming. Later, in mature EpiSCs, *Otx2* cooperates with Fgf2 and BMP4 to prevent EpiSC instability and the mesendoderm-to-neural fate switch.



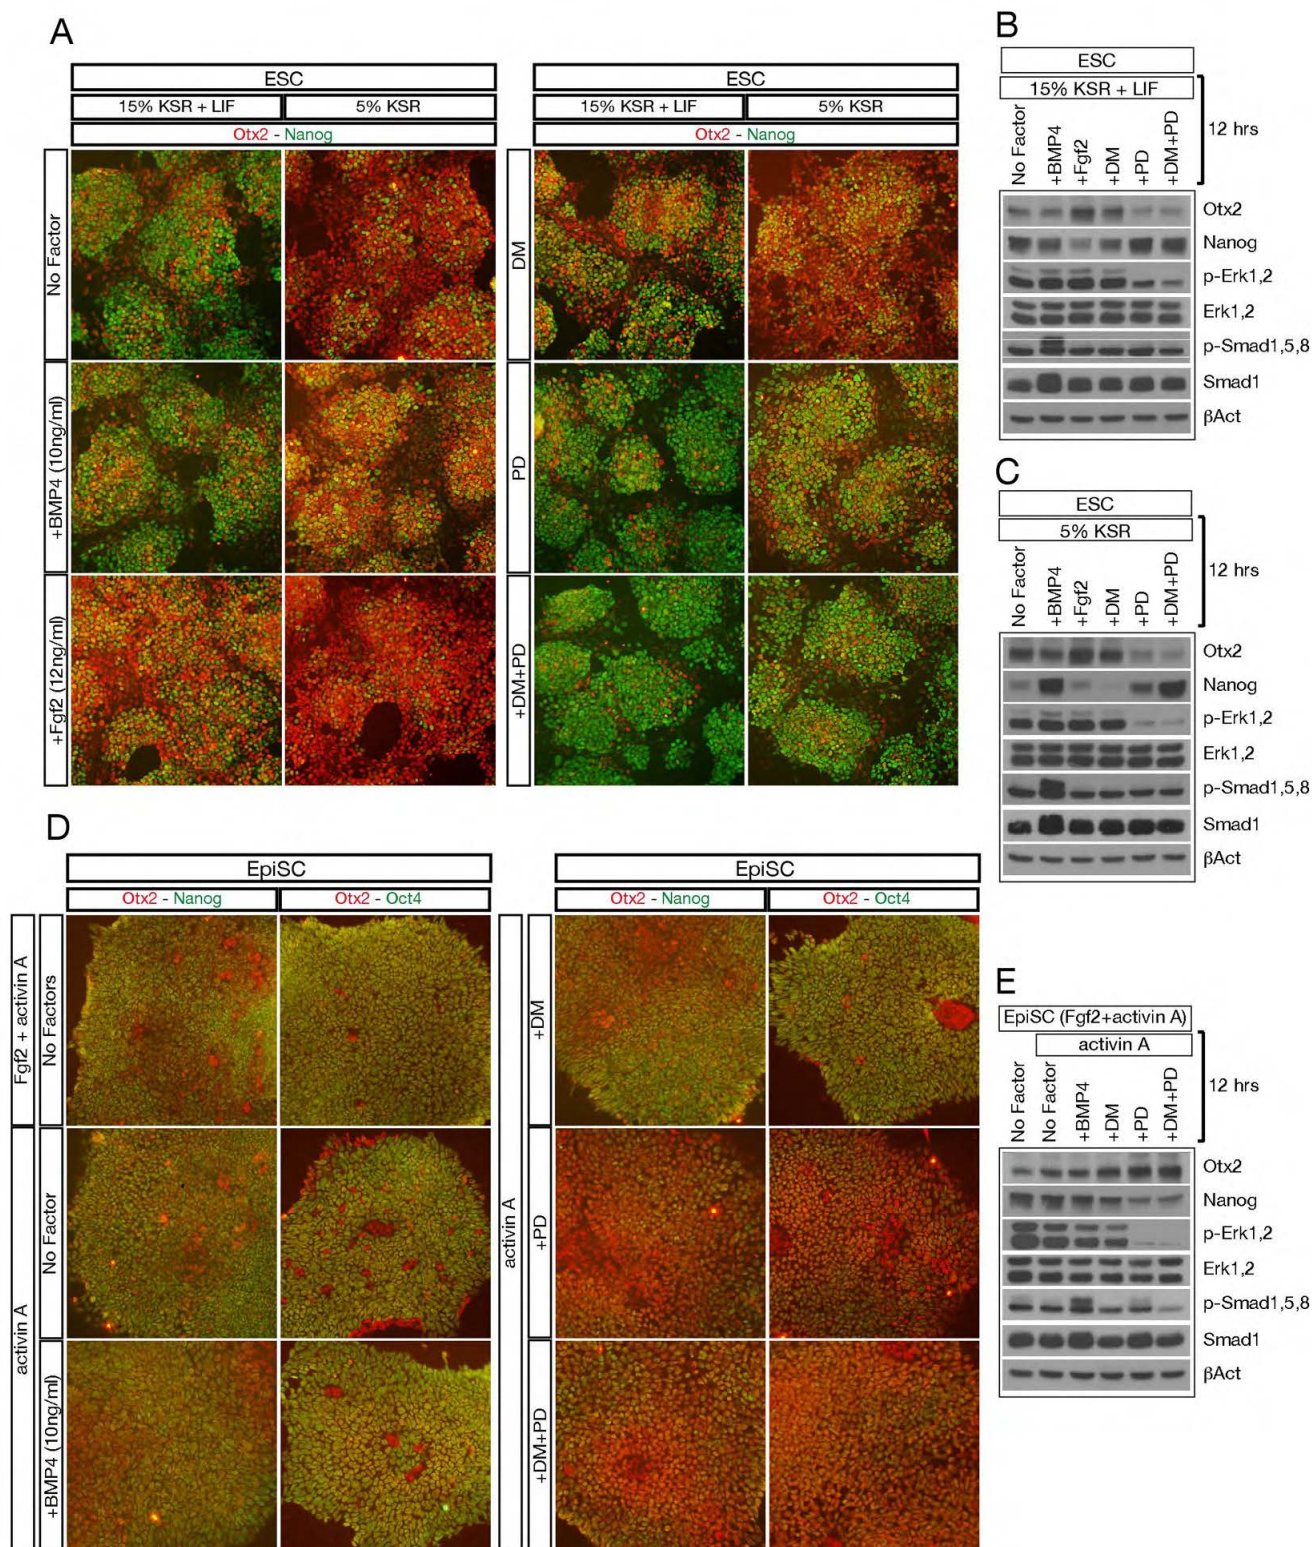

**Fig. S12. Otx2 response to Fgf2 and BMP4 factors and their inhibitors.** (A-C) Otx2 and Nanog expression analyzed by immunohistochemistry (A) and western blotting (B,C) in ESCs cultured in 15% KSR plus LIF without the addition of any factor or inhibitor (no factors) or 12 hours in the presence of BMP4 or Fgf2, or DM or PD, or both DM and PD (A,B); Otx2 and Nanog expression is also analyzed in ESCs cultured for 12 hours in 5% KSR only or with the same factors or inhibitors as for ESCs cultured in 15% KSR+LIF (A,C). (D,E) Immunohistochemistry with Otx2 and Nanog and Otx2 and Oct4 (D) and western blot analysis with Otx2 and Nanog in EpiSCs induced with Fgf2 and activin A, or Fgf2-deprived and cultured for 12 hours in activin A only or supplemented with BMP4 or DM or PD or both DM and PD (E). The expression level of p-Smad1,5,8, p-Erk1,2, total Erk1,2 and Smad1 is monitored in all experiments (B,C,E) to control the activity of BMP4 and Fgf2 and their inhibitors.  $\beta$ -actin is employed to normalize western blots

**Table S1. RT-PCR primers**

| mRNA           | Forward primer           | Reverse primer            | Size (bp) | N° cycles |
|----------------|--------------------------|---------------------------|-----------|-----------|
| $\beta$ -actin | GGTCCGATGCCCTGAGGCTC     | ACTTGCGGTGCACGATGGAGG     | 360       | 18        |
| <i>Klf4</i>    | TGCTGAACAGCAGGGACTGTCAC  | AGGTGTGCCTTGAGATGAGAACTC  | 280       | 24        |
| <i>Rex1</i>    | ACTGTGCTGCCTCCAAGTGTGTC  | AGGGAAGCCATCTTCCTCAGTCTC  | 330       | 20        |
| <i>Fgf5</i>    | TCGGTTTCCATCTGCAGATCTACC | TTCTGTGGATCGCGGACGCATAG   | 252       | 22        |
| <i>Cer-1</i>   | GTGGAAAGCGATCATGTCTCATCG | GCAAAGGTTGTTCTGGACAACGAC  | 261       | 28        |
| <i>Oct4</i>    | GCCGACAACAATGAGAACCTTCAG | CGCCGGTTACAGAACCATACTCG   | 215       | 22        |
| <i>Fgf4</i>    | GCAACGTGGGCATCGGATTC     | GTTACCTTCATGGTAGGCGACA    | 316       | 25        |
| <i>Fgfr1</i>   | GTCACAGCCACTCTCTGCACTG   | GACGGAGAAGTAGGTGGTATCGCT  | 310       | 26        |
| <i>Fgfr2</i>   | GCTCCAATGCAGAAGTGCTGGCTC | GGCAGAACTGTCAACCATGCAGAG  | 276       | 28        |
| <i>Fgfr3</i>   | GGAGGAGCTGATGGAACTGATG   | GAACAGGACCTTCTCCTGAGGACAG | 270       | 28        |
| <i>Fgfr4</i>   | GCTTTGTCCCTTGAGGCCTCTGAG | GTATCGGCCAGCATCCTCAGGAAG  | 243       | 28        |
| <i>Mta1</i>    | CAAGTCGGAATCTCCTGCTCAATG | GGCGCAGGGCAATGGGTTGTAGG   | 225       | 25        |
| <i>Mta2</i>    | GAGAACTCCTCCAGCAATCCTTAC | GTGGCTGGTAATGATTCAAACCTGC | 255       | 25        |
| <i>Hdac1</i>   | CCTCACAAGCCAATGCTGAGGAG  | GTTACAGCGATGTCCGTCTGCTG   | 237       | 27        |
| <i>Rbap46</i>  | GAAGATACTGTGGAGGAGCGTGTC | CATCAAACGTGCATCATCATTGG   | 260       | 25        |
| <i>Mbd3</i>    | TTCCAGGTCTCAGTGCAGGGA    | TGACTTCCTGGTGGGCTGCT      | 334       | 25        |
| <i>T</i>       | CACCAGCATGCTGCCTGTGAGTCA | CTGGCTGTCAGAAATGTCTGTGAC  | 264       | 27        |
| Goosecoid      | TCTTCACCGATGAGCAGCTCGAAG | CAGCTGTCCGAGTCCAAATCGCT   | 276       | 29        |
| <i>Eomes</i>   | GCTTCAACATAAACGGACTCAACC | GTTCAATCAAGTCCTCCACACCGT  | 344       | 27        |
| <i>Mixl1</i>   | AGTTGCTGGAGCTCGTCTCCGA   | ATCCGGAACGTGGTTCACATCTG   | 266       | 27        |
| <i>Tbx6</i>    | GCTTCCTCTCTGGGATCGAGGCAG | CCTCTGGGTCCAGGCCAGTGA CTG | 264       | 28        |
| <i>Foxg1</i>   | ACTTTGAGTTACAACGGGACCACG | AAAGTAACTGGTCTGGCCCGC     | 282       | 27        |
| <i>Emx2</i>    | ACGACACAAGTCCCGAGAGTTTCC | TGCTTGGTAGCAATTCTCCACCG   | 310       | 28        |
| <i>Dmbx1</i>   | CCATCAGTGCATGCGCTTACGTT  | GGCAAACCAGGAGGCTGTTCTG    | 399       | 29        |
| <i>En1</i>     | CAACCCTGCGATCCTACTCATGG  | GATATAGCGGTTTGCTGGA ACTC  | 247       | 29        |
| <i>Gbx2</i>    | ATGGCGCTCACCTCCACGCTCAT  | CATCTGAGCTGTAATCCACATCG   | 340       | 28        |
| <i>Sox1</i>    | GCACCAAGGCCAACCAAGATCGG  | TTCTTGAGCAGCGTCTTGGTCTTG  | 268       | 27        |
| <i>Hnf3b</i>   | TCCGACTGGAGCAGCTACTACG   | TCAGACTCGGACTCAGGTGAGGTC  | 300       | 27        |
| <i>Emx1</i>    | CAGGACGGGCTGCTTTTGACAG   | GTGACATCAATGCTCCTCCCGTTG  | 326       | 30        |
| <i>Tbr1</i>    | GGAGACTCAGTTCATCGCTGTCA  | CTTGGCGTAGTTGCTCACGAACTG  | 241       | 30        |
| <i>En2</i>     | TCCGACTCGGACAGCTCTCAAG   | TCTTGATCTAGACTCGTTCAGG    | 280       | 29        |
| <i>Hoxa2</i>   | CCTGCCTGCCTCGGCCACAAAG   | CACTGGGTTTGCTCTTATGCTTC   | 242       | 31        |
| <i>Hoxa11</i>  | CACACTGAGGACAAGGCCGGTG   | CCCTCCCAATTCCAGTAGGCTGG   | 270       | 33        |
| <i>Hoxb1</i>   | CAACCTTTGCATCAGCCTACGAC  | CACCTGCGTTTCATTGAGCTCCA   | 290       | 32        |
| <i>Hoxb5</i>   | GCCAATTTACCGAAATAGACGAG  | ATCTGACGCTCGGACAGGCAAAG   | 330       | 33        |



Table S2. ESC subsets co-expressing Otx2 and Nanog

| Genotype | N° of Exp. | ESC subpopulations co-expressing different levels of Otx2 and Nanog |                                        |                                        |                           |                                          |                                          |                           |                                          |                                          |
|----------|------------|---------------------------------------------------------------------|----------------------------------------|----------------------------------------|---------------------------|------------------------------------------|------------------------------------------|---------------------------|------------------------------------------|------------------------------------------|
|          |            | Total Otx2 <sup>+</sup> cells                                       | Otx2 <sup>+</sup> Nanog <sup>h+m</sup> | Otx2 <sup>+</sup> Nanog <sup>l+a</sup> | Total Otx2 <sup>h+m</sup> | Otx2 <sup>h+m</sup> Nanog <sup>h+m</sup> | Otx2 <sup>h+m</sup> Nanog <sup>l+a</sup> | Total Otx2 <sup>l+a</sup> | Otx2 <sup>l+a</sup> Nanog <sup>h+m</sup> | Otx2 <sup>l+a</sup> Nanog <sup>l+a</sup> |
| wt       | 4          | 1436±201                                                            | 672±55                                 | 736±149                                | 625±63                    | 234±23                                   | 398±54                                   | 399±50                    | 261±23                                   | 138±28                                   |

h, m, l or a indicate high, moderate, low or absent expression, respectively; Otx2<sup>+</sup> or Nanog<sup>+</sup> indicate ESCs expressing the indicated factor regardless of the expression level.

**Table S3. Total Oct4<sup>+</sup> cells and Oct4<sup>+</sup> cells co-expressing Nanog or Otx2 in ESCs and SFEBs**

| Genotype                               | No of Exp. | Time course (hours) | Total Oct4 <sup>+</sup> cells and Oct4 <sup>+</sup> subtypes expressing Nanog or Otx2 (mean ± s.d.) |                   |                               |                                      |                               |                                     |
|----------------------------------------|------------|---------------------|-----------------------------------------------------------------------------------------------------|-------------------|-------------------------------|--------------------------------------|-------------------------------|-------------------------------------|
|                                        |            |                     | Total cells                                                                                         | Oct4 <sup>+</sup> | Total Oct4 <sup>+</sup> cells | Oct4 <sup>+</sup> Nanog <sup>+</sup> | Total Oct4 <sup>+</sup> cells | Oct4 <sup>+</sup> Otx2 <sup>+</sup> |
| wt                                     | 4          | 0 (ESC)             | *                                                                                                   | *                 | 2813±125                      | 1991±138                             | 2770±286                      | 1281±191                            |
| wt                                     | 4          | 6                   | *                                                                                                   | *                 | 2613±232                      | 1472±154                             | 2338±285                      | 1496±128                            |
| wt                                     | 4          | 12                  | *                                                                                                   | *                 | 2930±142                      | 824±64                               | 3261±182                      | 2901±206                            |
| wt                                     | 4          | 24                  | *                                                                                                   | *                 | 2566±243                      | 622±80                               | 2742±214                      | 2555±192                            |
| wt                                     | 4          | 48                  | 2643±108                                                                                            | 2459±145          | 2995±301                      | 1828±137                             | 3255±165                      | 2728±243                            |
| wt                                     | 4          | 72                  | 2709±136                                                                                            | 1935±104          | 2067±167                      | 1503±141                             | 2127±149                      | 1856±112                            |
| wt                                     | 4          | 90                  | 2423±94                                                                                             | 1197±109          | **                            | **                                   | **                            | **                                  |
| <i>Otx2</i> <sup>-/-</sup>             | 4          | 0 (ESC)             | *                                                                                                   | *                 | **                            | **                                   | n/a                           | n/a                                 |
| <i>Otx2</i> <sup>-/-</sup>             | 4          | 12                  | *                                                                                                   | *                 | **                            | **                                   | n/a                           | n/a                                 |
| <i>Otx2</i> <sup>-/-</sup>             | 4          | 24                  | *                                                                                                   | *                 | **                            | **                                   | n/a                           | n/a                                 |
| <i>Otx2</i> <sup>-/-</sup>             | 4          | 48                  | 3207±39                                                                                             | 1922±198          | **                            | **                                   | n/a                           | n/a                                 |
| <i>Otx2</i> <sup>-/-</sup>             | 4          | 72                  | 3212±202                                                                                            | 1223±188          | **                            | **                                   | n/a                           | n/a                                 |
| <i>Otx2</i> <sup>-/-</sup>             | 4          | 90                  | 3904±431                                                                                            | 664±138           | **                            | **                                   | n/a                           | n/a                                 |
| <i>R26</i> <sup><i>Otx2/Otx2</i></sup> | 4          | 0 (ESC)             | 3024±169                                                                                            | 2393±190          | **                            | **                                   | n/a                           | n/a                                 |
| <i>R26</i> <sup><i>Otx2/Otx2</i></sup> | 4          | 12                  | 3125±131                                                                                            | 2566±154          | **                            | **                                   | n/a                           | n/a                                 |
| <i>R26</i> <sup><i>Otx2/Otx2</i></sup> | 4          | 24                  | 3131±149                                                                                            | 2337±166          | **                            | **                                   | n/a                           | n/a                                 |
| <i>R26</i> <sup><i>Otx2/Otx2</i></sup> | 4          | 48                  | 2965±162                                                                                            | 1986±126          | **                            | **                                   | n/a                           | n/a                                 |
| <i>R26</i> <sup><i>Otx2/Otx2</i></sup> | 4          | 72                  | 2859±95                                                                                             | 1459±154          | **                            | **                                   | n/a                           | n/a                                 |
| <i>R26</i> <sup><i>Otx2/Otx2</i></sup> | 4          | 90                  | 4980±332                                                                                            | 1407±150          | **                            | **                                   | n/a                           | n/a                                 |

\*At 6, 12 and 24 hours all cells were Oct4<sup>+</sup> in wt and *Otx2*<sup>-/-</sup> ESC lines and differentiating SFEBs.

\*\*Not determined.

**Table S4. ALP in wt and *Otx2* mutant ESC colonies**

| Undifferentiated ESC colonies ( $\times 10^3$ plated ESCs) (mean $\pm$ s.d.) |            |                                    |                                    |                                             |
|------------------------------------------------------------------------------|------------|------------------------------------|------------------------------------|---------------------------------------------|
| Genotype                                                                     | N° of Exp. | Uniform ALP <sup>+</sup><br>(+LIF) | Uniform ALP <sup>+</sup><br>(-LIF) | Uniform ALP <sup>+</sup><br>(-LIF+JAK inh.) |
| wt                                                                           | 4          | 232 $\pm$ 39                       | 6 $\pm$ 4                          | 0                                           |
| <i>Otx2</i> <sup>-/-</sup>                                                   | 4          | 823 $\pm$ 66                       | 311 $\pm$ 61                       | 124 $\pm$ 30                                |
| <i>R26</i> <sup><i>Otx2/Otx2</i></sup>                                       | 4          | 72 $\pm$ 16                        | n/a                                | n/a                                         |



Table S5. Oct4, Nanog and Klf4 in wt, *Otx2*<sup>-/-</sup> and *R26*<sup>*Otx2/Otx2*</sup> ESCs

| Oct4, Nanog and Klf4 ESC subsets (mean ± s.d.) |            |             |                   |             |                    |             |                   |
|------------------------------------------------|------------|-------------|-------------------|-------------|--------------------|-------------|-------------------|
| Genotype                                       | N° of Exp. | Total cells | Oct4 <sup>+</sup> | Total cells | Nanog <sup>+</sup> | Total cells | Klf4 <sup>+</sup> |
| wt                                             | 4          | *           | *                 | 2630±127    | 1863±142           | 2328±71     | 1508±138          |
| <i>Otx2</i> <sup>-/-</sup>                     | 4          | *           | *                 | 2587±125    | 2444±131           | 2235±83     | 2036±142          |
| <i>R26</i> <sup><i>Otx2/Otx2</i></sup>         | 4          | 3024±169    | 2393±190          | 2606±133    | 1410±107           | 2446±237    | 437±87            |

\*All cells were Oct4<sup>+</sup> in wt and *Otx2*<sup>-/-</sup> ESCs.

**Table S6. Chimeric embryos generated by control and *Otx2* mutant ESCs**

| Genotype                                      | Injected embryos | Recovered embryos | Chimerism |          |     |                          |
|-----------------------------------------------|------------------|-------------------|-----------|----------|-----|--------------------------|
|                                               |                  |                   | High      | Moderate | Low | Undetectable or very low |
| <i>R26<sup>GFP/+</sup></i>                    | 76               | 65                | 39        | 16       | 6   | 4                        |
| <i>Otx2<sup>-/-</sup>;R26<sup>GFP/+</sup></i> | 83               | 61                | 26        | 22       | 11  | 2                        |
| <i>R26<sup>Otx2/Otx2</sup></i>                | 105              | 78                | 0         | 0        | 13  | 65                       |

**Table S7. Teratoma occurrence in wt and *Otx2* mutant ESCs and EpiSCs**

| Genotype                                      | Number of subcutaneous injections | Number of injected ESCs | Number of injected EpiSCs | Recovered teratomas | Size*           |                 |              |
|-----------------------------------------------|-----------------------------------|-------------------------|---------------------------|---------------------|-----------------|-----------------|--------------|
|                                               |                                   |                         |                           |                     | Large (>0.7 cm) | Small (<0.5 cm) | Undetectable |
| <i>R26<sup>GFP/+</sup></i>                    | 12                                | 1.5×10 <sup>6</sup>     |                           | 12                  | 10              | 2               | 0            |
| <i>Otx2<sup>-/-</sup>;R26<sup>GFP/+</sup></i> | 11                                | 1.5×10 <sup>6</sup>     |                           | 2                   | 0               | 2               | 9            |
| <i>Otx2<sup>-/-</sup>;R26<sup>GFP/+</sup></i> | 10                                | 6×10 <sup>6</sup>       |                           | 6                   | 1               | 5               | 4            |
| <i>R26<sup>Otx2/Otx2</sup></i>                | 12**                              | 1.5×10 <sup>6</sup>     |                           | 10                  | 8               | 2               | 1            |
| <i>R26<sup>GFP/+</sup></i>                    | 6                                 |                         | 1.5×10 <sup>6</sup>       | 4                   | 4               | 0               | 2            |
| <i>Otx2<sup>-/-</sup>;R26<sup>GFP/+</sup></i> | 8                                 |                         | 1.5×10 <sup>6</sup>       | 7                   | 4               | 3               | 1            |

\*The size classification was based on the largest diameter after mid-sectioning of the teratomas.

\*\*One of the injected mice died prematurely.

**Table S8. Wt, *Otx2*<sup>-/-</sup> and *R26*<sup>*Otx2/Otx2*</sup> neural and mesendoderm cell lineages in SFEBs at d3.5**

| Genotype                               | N° of Exp. | Factor (ng/ml) | Number of neural and mesendodermal cells (mean ± s.d.) |                   |             |                |             |                                      |
|----------------------------------------|------------|----------------|--------------------------------------------------------|-------------------|-------------|----------------|-------------|--------------------------------------|
|                                        |            |                | Total cells                                            | Sox1 <sup>+</sup> | Total cells | T <sup>+</sup> | Total cells | Sox1 <sup>-</sup> Foxa2 <sup>+</sup> |
| wt                                     | 4          | None           | 4218±575                                               | 2151±293          | 3857±383    | 679±184        | 3061±358    | 805±142                              |
| <i>Otx2</i> <sup>-/-</sup>             | 4          | None           | 3982±467                                               | 3464±273          | n/a         | n/a            | n/a         | n/a                                  |
| <i>R26</i> <sup><i>Otx2/Otx2</i></sup> | 4          | None           | 4780±576                                               | 1496±246          | 5342±349    | 1199±264       | 3951±149    | 2343±268                             |



**Table S9. Pluripotent, neural and non-neural cells in wt and *Otx2* mutant SFEBs derived from ESCs or EpiSCs**

| Genotype                                                       | N° of Exp. | BMP4<br>(ng/ml) | Number of Oct4 <sup>+</sup> , Sox1 <sup>+</sup> and Sox1 <sup>-</sup> Oct4 <sup>-</sup> cells in SFEBs at day 5 (mean ± s.d.) |                   |                   |                                     |
|----------------------------------------------------------------|------------|-----------------|-------------------------------------------------------------------------------------------------------------------------------|-------------------|-------------------|-------------------------------------|
|                                                                |            |                 | Total cells                                                                                                                   | Oct4 <sup>+</sup> | Sox1 <sup>+</sup> | Sox1 <sup>-</sup> Oct4 <sup>-</sup> |
| wt<br>ESC-derived<br>SFEBs                                     | 4          | —               | 4974±336                                                                                                                      | 77±18             | 3730±314          | 1166±239                            |
| <i>Otx2</i> <sup>-/-</sup><br>ESC-derived<br>SFEBs             | 4          | —               | 4595±298                                                                                                                      | 51±25             | 4357±231          | 202±108                             |
| <i>R26</i> <sup><i>Otx2/Otx2</i></sup><br>ESC-derived<br>SFEBs | 4          | —               | 4240±303                                                                                                                      | 44±10             | 1191±179          | 3005±183                            |
| wt<br>ESC-derived<br>SFEBs                                     | 4          | 10              | 5037±663                                                                                                                      | 2450±266          | 9±3               | 2576±421                            |
| <i>Otx2</i> <sup>-/-</sup><br>ESC-derived<br>SFEBs             | 4          | 10              | 4912±578                                                                                                                      | 4213±333          | 12±7              | 686±265                             |
| wt<br>ESC-derived<br>SFEBs                                     | 4          | 0.5             | 3987±375                                                                                                                      | 514±86            | 1943±236          | 1529±283                            |
| <i>R26</i> <sup><i>Otx2/Otx2</i></sup><br>ESC-derived<br>SFEBs | 4          | 0.5             | 4013±469                                                                                                                      | 234±84            | 115±47            | 3688±281                            |
| wt<br>EpiSC-derived<br>SFEBs                                   | 4          | 10              | 6398±135                                                                                                                      | 13±3              | 373±136           | 6021±252                            |
| <i>Otx2</i> <sup>-/-</sup><br>EpiSC-derived<br>SFEBs           | 4          | 10              | 6478±181                                                                                                                      | 17±4              | 1735±263          | 4736±331                            |

**Table S10. Pallial and sub-pallial differentiation in wt, *Otx2*<sup>-/-</sup> and *R26*<sup>*Otx2/Otx2*</sup> neural differentiation**

| Genotype                               | N° of Exp. | Number of Foxg1 <sup>+</sup> cells co-expressing pallial or sub-pallial markers (mean ± s.d.) |                          |                                      |                          |                                        |
|----------------------------------------|------------|-----------------------------------------------------------------------------------------------|--------------------------|--------------------------------------|--------------------------|----------------------------------------|
|                                        |            | Factor (ng/ml)                                                                                | Total Foxg1 <sup>+</sup> | Pax6 <sup>+</sup> Foxg1 <sup>+</sup> | Total Foxg1 <sup>+</sup> | Nkx2.1 <sup>+</sup> Foxg1 <sup>+</sup> |
| wt                                     | 4          | None                                                                                          | 1337±125                 | 84±23                                | 1407±146                 | 930±55                                 |
| <i>Otx2</i> <sup>-/-</sup>             | 4          | None                                                                                          | 566±118                  | 18±5                                 | 641±108                  | 391±24                                 |
| <i>R26</i> <sup><i>Otx2/Otx2</i></sup> | 4          | None                                                                                          | 1507±136                 | 744±104                              | 1491±125                 | 18±8                                   |
| wt                                     | 4          | Dkk1 (500 ng/ml)                                                                              | 1531±145                 | 1069±107                             | 1418±109                 | 131±30                                 |
| <i>Otx2</i> <sup>-/-</sup>             | 4          | Dkk1 (500 ng/ml)                                                                              | 941±72                   | 21±9                                 | 938±70                   | 494±57                                 |
| <i>R26</i> <sup><i>Otx2/Otx2</i></sup> | 4          | Dkk1 (500 ng/ml)                                                                              | 1509±169                 | 886±96                               | 1493±161                 | 15±5                                   |
